# Supplementary material
Source: PubMed Central journal article supplement (PMC4107874)
Supplement: NIHMS598071-supplement-eFigures_and_eTables.pdf [file NIHMS598071-supplement-eFigures_and_eTables.pdf]

# Visual Field Profile of Optic Neuritis

## A Final Follow-up Report From the Optic Neuritis Treatment Trial From Baseline Through 15 Years

John L. Keltner, MD; Chris A. Johnson, PhD; Kimberly E. Cello, BS; Mariya Dontchev, MPH; Robin L. Gal, MSPH; Roy W. Beck, MD, PhD; for the Optic Neuritis Study Group

Arch Ophthalmol. 2010;128(3):330-337

**eTable 1. Reader Agreement<sup>a</sup>**

| Readers in Agreement                        | No. (%) of Visual Fields |
|---------------------------------------------|--------------------------|
| <b>Visits 1-8 and Years 1-5, 10, and 15</b> |                          |
| 3/3                                         | 7052 (67.7)              |
| 2/3                                         | 2832 (27.2)              |
| 0/3                                         | 537 (5.1)                |
| <b>Total</b>                                | <b>10 421 (100)</b>      |
| <b>Retest, Visits 1-8</b>                   |                          |
| 3/3                                         | 232 (59.8)               |
| 2/3                                         | 135 (34.8)               |
| 0/3                                         | 21 (5.4)                 |
| <b>Total</b>                                | <b>388 (100)</b>         |

<sup>a</sup>Twenty-two visual fields were omitted due to very poor patient reliability.

**eTable 2. Frequency of VF Abnormalities for the Affected and Fellow Eyes**

| Classification                                      | Baseline (Visit 1) | Visits 2-8  | Years      |            |            |            |  |
|-----------------------------------------------------|--------------------|-------------|------------|------------|------------|------------|--|
|                                                     |                    |             | 1          | 5          | 10         | 15         |  |
| No. of VFs                                          |                    |             |            |            |            |            |  |
| AE                                                  | 423                | 3003        | 422        | 389        | 263        | 233        |  |
| FE                                                  | 454                | 1731        | 419        | 391        | 265        | 236        |  |
| No. of Patients                                     |                    |             |            |            |            |            |  |
| AE                                                  | 423                | 437         | 422        | 389        | 263        | 233        |  |
| FE                                                  | 454                | 439         | 419        | 391        | 265        | 236        |  |
| NLP or no VF examination performed, No. of patients |                    |             |            |            |            |            |  |
| AE                                                  | 31                 | 17          | 32         | 65         | 191        | 221        |  |
| FE                                                  | 0                  | 15          | 35         | 63         | 189        | 218        |  |
| Abnormal, No. (%) of VFs                            |                    |             |            |            |            |            |  |
| AE                                                  | 423 (100.0)        | 2088 (69.5) | 203 (48.1) | 198 (50.9) | 130 (49.4) | 118 (50.6) |  |
| FE                                                  | 339 (74.7)         | 750 (43.3)  | 167 (39.9) | 153 (39.1) | 91 (34.3)  | 84 (35.6)  |  |
| Normal, No. (%) of VFs                              |                    |             |            |            |            |            |  |
| AE                                                  | 0                  | 915 (30.5)  | 219 (51.9) | 191 (49.1) | 133 (50.6) | 115 (49.4) |  |
| FE                                                  | 115 (25.3)         | 981 (56.7)  | 252 (60.1) | 238 (60.9) | 174 (65.7) | 152 (64.4) |  |

Abbreviations: AE, affected eye; FE, fellow eye; NLP, no light perception; VF, visual field.

**eTable 3. Association of VF Classifications With Mean MD and Mean PSD in the Affected Eye**

| Classification         | No. of VFs<br>(n=3664) | MD, Mean<br>(25th-75th Percentile) | No. of VFs<br>(n=247) | Mean PSD |
|------------------------|------------------------|------------------------------------|-----------------------|----------|
| Total loss             | 488                    | -27.87 (-32.27 to -24.05)          | 15                    | 8.33     |
| Three quadrants        | 10                     | -18.08 (-20.07 to -16.85)          | 0                     | ...      |
| Peripheral rim         | 4                      | -17.28 (-17.86 to -16.71)          | 0                     | ...      |
| Altitudinal            | 86                     | -16.49 (-18.91 to -14.84)          | 1                     | 9.44     |
| Central                | 541                    | -14.13 (-24.85 to -4.35)           | 11                    | 3.98     |
| Hemianopia             | 17                     | -12.27 (-15.47 to -10.53)          | 0                     | ...      |
| Quadrant               | 40                     | -7.64 (-9.57 to -5.97)             | 4                     | 9.79     |
| Arcuate                | 436                    | -10.36 (12.94 to -7.45)            | 29                    | 7.10     |
| Partial hemianopia     | 23                     | -10.11 (-13.16 to -6.84)           | 1                     | 10.81    |
| Centrocecal            | 45                     | -6.77 (-8.56 to -3.64)             | 4                     | 7.33     |
| Partial arcuate        | 519                    | -4.92 (-6.01 to -3.59)             | 51                    | 3.84     |
| Widespread             | 259                    | -4.36 (-5.14 to -3.38)             | 16                    | 2.27     |
| Vertical step          | 87                     | -3.78 (-4.79 to -2.45)             | 6                     | 5.88     |
| Partial peripheral rim | 54                     | -3.23 (-3.61 to -2.34)             | 7                     | 6.39     |
| Multiple foci          | 133                    | -2.88 (-3.64 to -2.38)             | 11                    | 3.70     |
| Nasal step             | 67                     | -2.34 (-2.99 to -1.26)             | 6                     | 4.65     |
| Superior depression    | 17                     | -2.33 (-3.39 to -1.27)             | 1                     | 3.66     |
| Enlarged blind spot    | 77                     | -2.23 (-2.84 to -1.42)             | 9                     | 2.67     |
| Temporal wedge         | 44                     | -1.93 (-2.83 to -1.30)             | 3                     | 5.78     |
| Paracentral            | 712                    | -1.81 (-2.53 to -1.26)             | 72                    | 2.72     |
| Inferior depression    | 5                      | -1.35 (-2.06 to -0.56)             | 0                     | ...      |

Abbreviations: ellipses, data not available; MD, mean deviation; PSD, pattern standard deviation; VF, visual field.

**eTable 4. Association of VF Classifications With Mean MD and Mean PSD in the Fellow Eye**

| Classification         | No. of VFs<br>(n=1916) | MD, Mean<br>(25th to 75th Percentile) | No. of VFs<br>(n=176) | Mean PSD |
|------------------------|------------------------|---------------------------------------|-----------------------|----------|
| Total loss             | 21                     | -27.13 (-31.25 to -24.65)             | 7                     | 7.52     |
| Peripheral rim         | 14                     | -11.59 (-15.88 to -7.53)              | 1                     | 12.94    |
| Altitudinal            | 4                      | -10.70 (-19.16 to -2.24)              | 0                     | ...      |
| Arcuate                | 163                    | -9.67 (-11.37 to -7.29)               | 19                    | 7.08     |
| Centrocecal            | 4                      | -8.93 (-13.45 to -4.41)               | 0                     | ...      |
| Three quadrants        | 1                      | -8.41 (-8.41 to -8.41)                | 0                     | ...      |
| Central                | 26                     | -8.30 (-13.94 to -3.24)               | 2                     | 6.46     |
| Quadrant               | 13                     | -6.16 (-7.20 to -4.47)                | 2                     | 10.69    |
| Partial hemianopia     | 5                      | -4.88 (-7.05 to -3.03)                | 0                     | ...      |
| Hemianopia             | 4                      | -4.69 (-5.99 to -3.39)                | 3                     | 6.31     |
| Partial arcuate        | 395                    | -4.39 (-5.39 to -3.43)                | 37                    | 4.38     |
| Widespread             | 145                    | -4.27 (-4.70 to -3.37)                | 14                    | 2.30     |
| Partial peripheral rim | 64                     | -2.88 (-3.96 to -1.60)                | 8                     | 6.41     |
| Multiple foci          | 144                    | -2.72 (-3.50 to -2.07)                | 6                     | 3.53     |
| Vertical step          | 44                     | -2.44 (-3.39 to -1.75)                | 4                     | 3.71     |
| Nasal step             | 124                    | -2.02 (-2.83 to -1.26)                | 11                    | 3.47     |
| Paracentral            | 663                    | -1.52 (-2.44 to -0.74)                | 54                    | 2.72     |
| Superior depression    | 11                     | -1.40 (-2.35 to -0.11)                | 1                     | 2.36     |
| Inferior depression    | 13                     | -1.37 (-2.27 to -0.59)                | 2                     | 3.81     |
| Temporal wedge         | 33                     | -0.95 (-1.80 to -0.34)                | 1                     | 3.41     |
| Enlarged blind spot    | 25                     | -0.86 (-2.38 to 0.82)                 | 4                     | 2.71     |

Abbreviations: ellipses, data not available; MD, mean deviation; PSD, pattern standard deviation; VF, visual field.

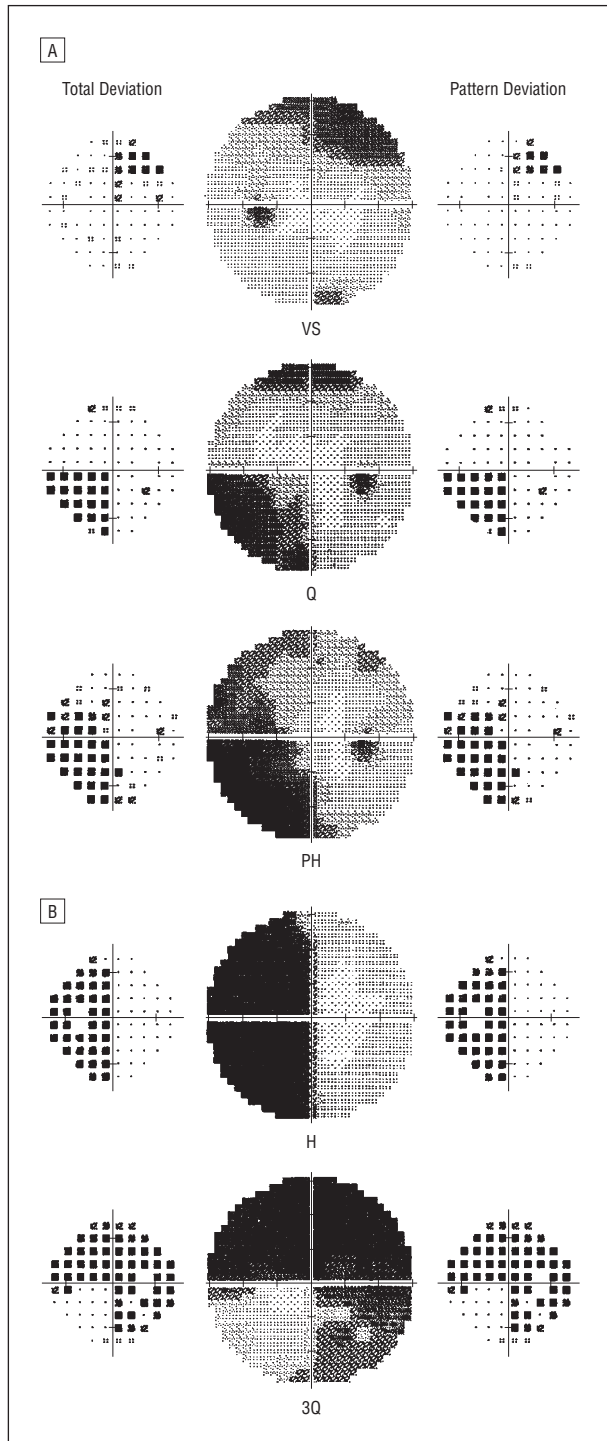

**eFigure 1.** Neurological visual field abnormality classifications. A, Vertical step (VS), quadrant (Q), and partial hemianopia (PH). B, Hemianopia (H) and 3 quadrants (3Q).

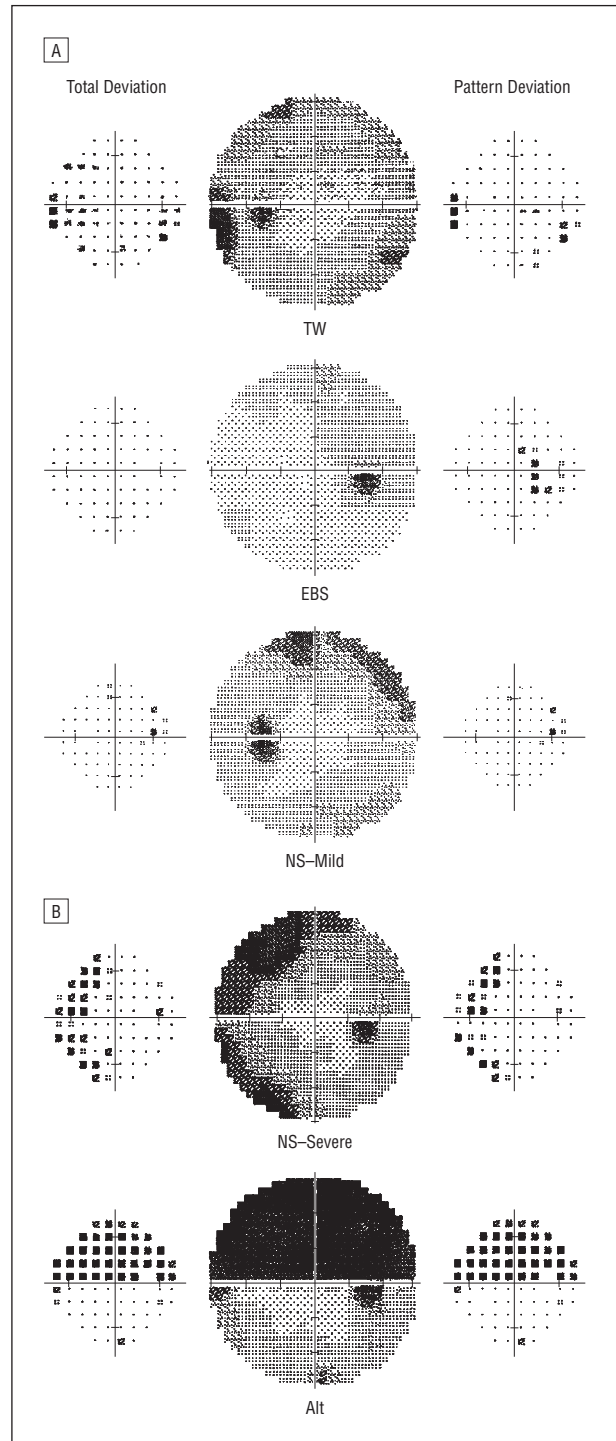

**eFigure 2.** Optic nerve visual field nerve fiber bundle abnormality classifications. A, Temporal wedge (TW), enlarged blind spot (EBS), nasal step—mild (NS—Mild). B, Nasal step—severe (NS—Severe) and altitudinal (Alt).

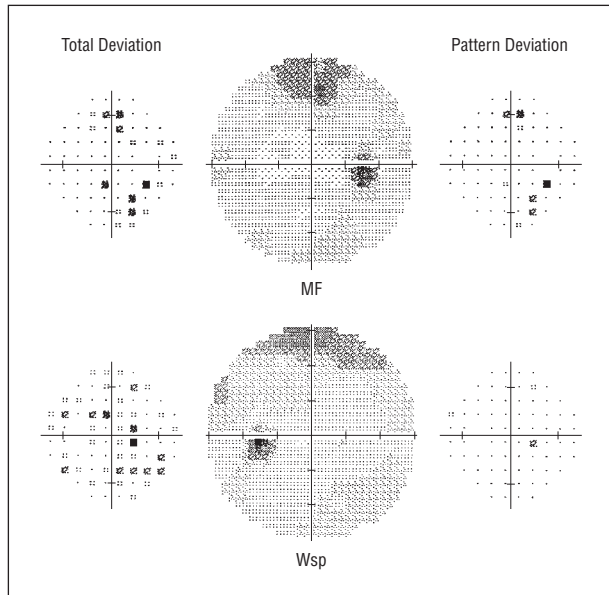

**eFigure 3.** Optic nerve visual field abnormality classifications. Diffuse abnormalities: multiple foci (MF) and widespread (Wsp).

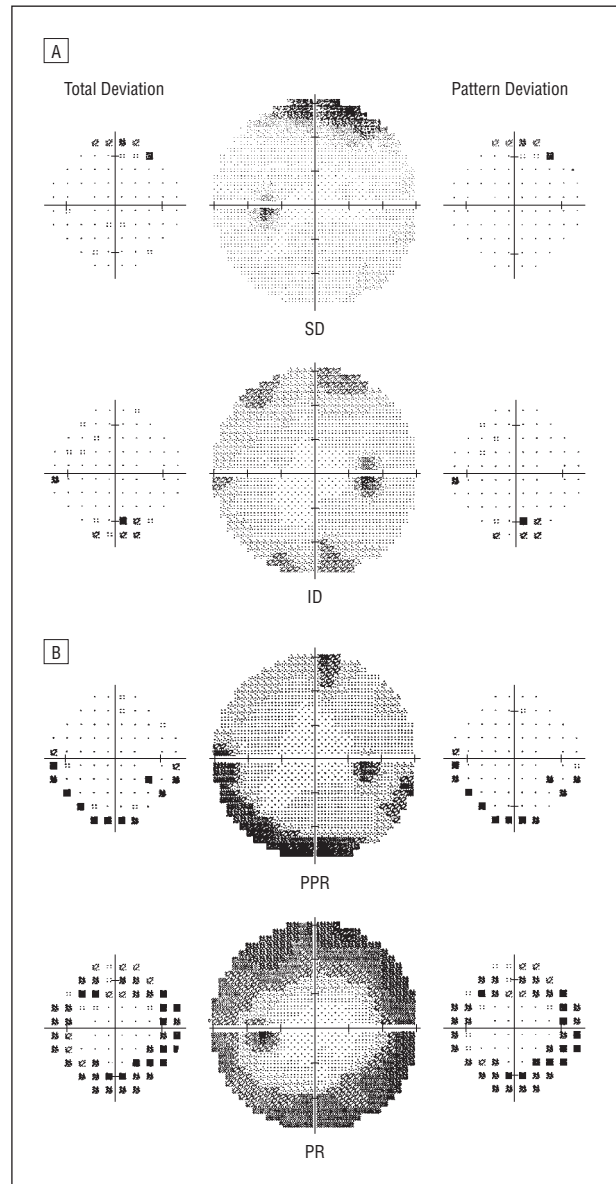

**eFigure 4.** Artifactual visual field abnormality classifications. A, Superior depression (SD) and inferior depression (ID). B, Partial peripheral rim (PPR) and peripheral rim (PR).

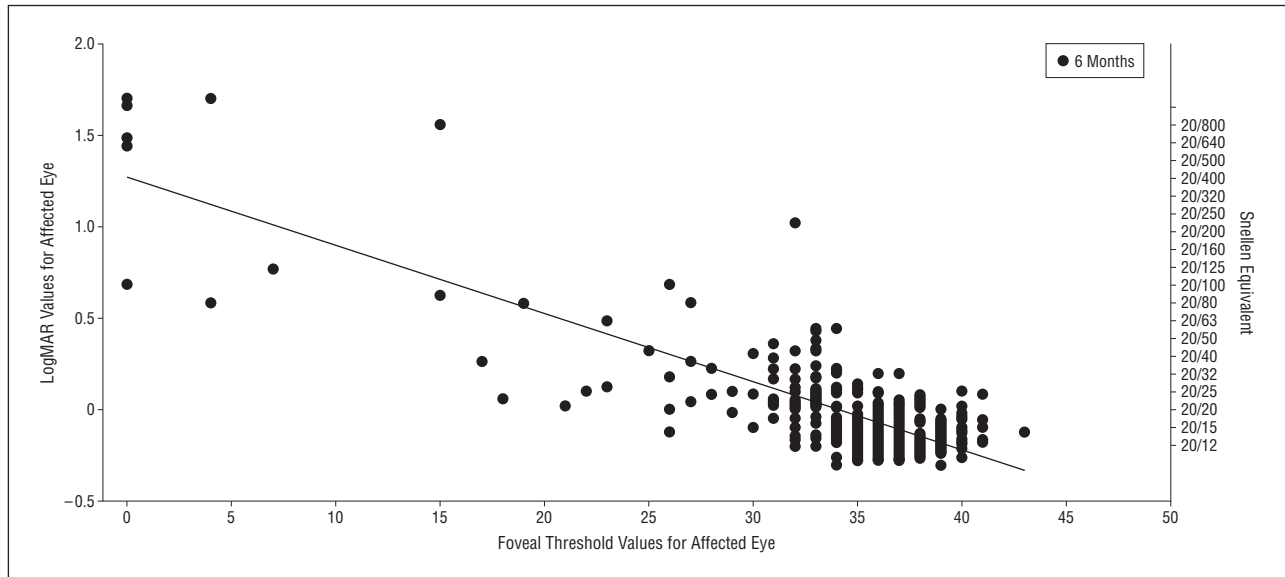

**eFigure 5.** Foveal threshold vs Snellen and logMAR (logarithm of the minimum angle of resolution) visual acuity and contrast sensitivity in the affected eye at 6 months. Pearson correlation for foveal threshold and logMAR values,  $r = -0.84$ ; and for foveal threshold and contrast sensitivity,  $r = 0.81$ .

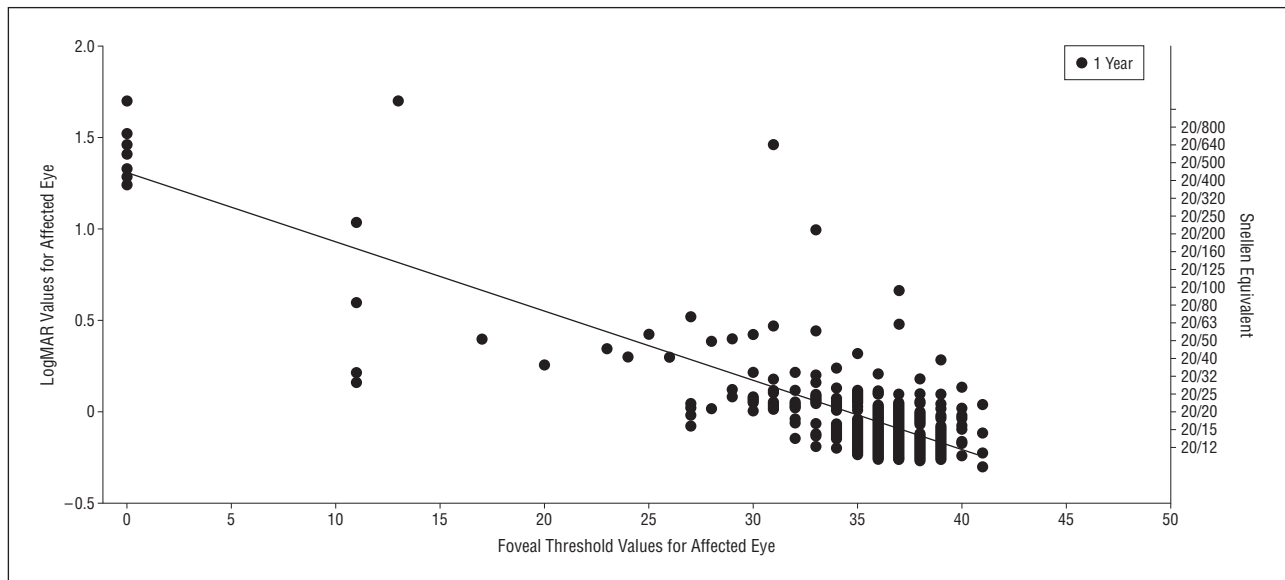

**eFigure 6.** Foveal threshold vs Snellen and logMAR (logarithm of the minimum angle of resolution) visual acuity and contrast sensitivity in the affected eye at 1 year. Pearson correlation for foveal threshold and logMAR values,  $r = -0.84$ ; and for foveal threshold and contrast sensitivity,  $r = 0.79$ .
